# Supplementary material for: The enhanced ferromagnetism of single-layer CrX3 (X = Br and I) via van der Waals engineering
Source: Royal Society of Chemistry journal article supplement (doi:10.1039/c9cp01837a), 2019-01-01
Supplement: c9cp01837a1.pdf [file c9cp01837a1.pdf]

## Supporting Information:

### The Enhanced Ferromagnetism of Single-Layer CrX<sub>3</sub> (X=Br and I) by Van der Waals Engineering

Hongxing Li,<sup>a,b</sup> Yuan-Kai Xu,<sup>a,b</sup> Kang Lai,<sup>a,b</sup> and Wei-Bing Zhang,<sup>a,b\*</sup>

*a School of Physics and Electronic Sciences, Changsha University of Science and  
Technology, Changsha 410114, People's Republic of China.*

*b Hunan Provincial Key Laboratory of Flexible Electronic Materials Genome  
Engineering, Changsha University of Science and Technology, Changsha 410114,  
People's Republic of China*

E-mail: zhangwb@csust.edu.cn

Phone: +86(0)73185258223. Fax: +86(0)73185258217

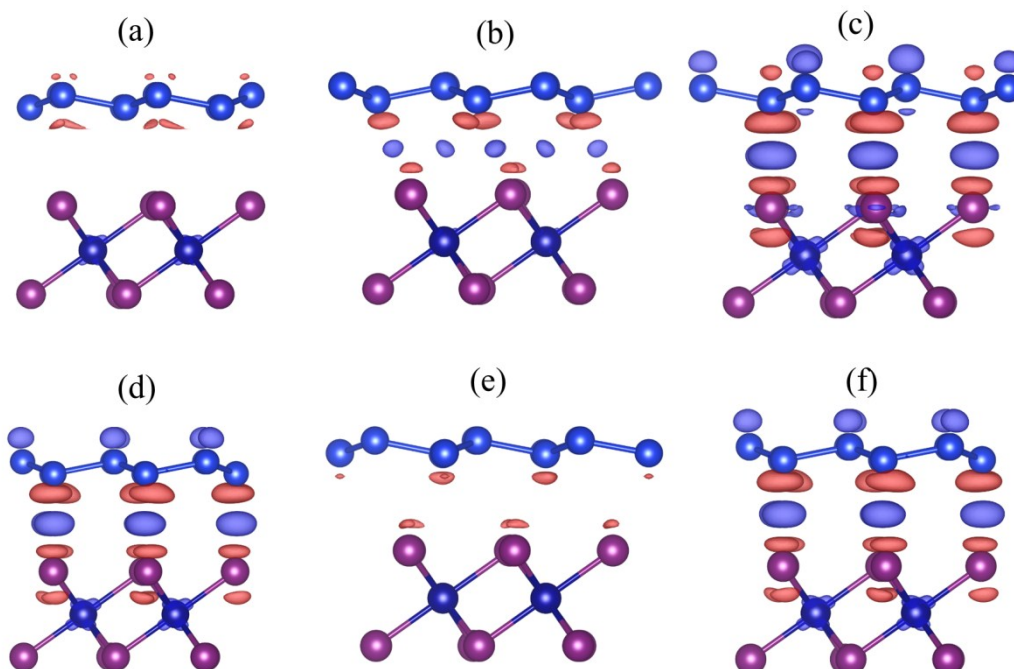

Fig. S1 Charge difference density of Si/CrI<sub>3</sub> for difference configuration (a)(d) TX<sub>up/dn</sub>, (b)(e) TbX<sub>up/dn</sub>, (c)(f) TuX<sub>up/dn</sub>. The blue and red represent the charge accumulation and depletion, the isosurface is set as 0.0005 eV·Å<sup>3</sup>

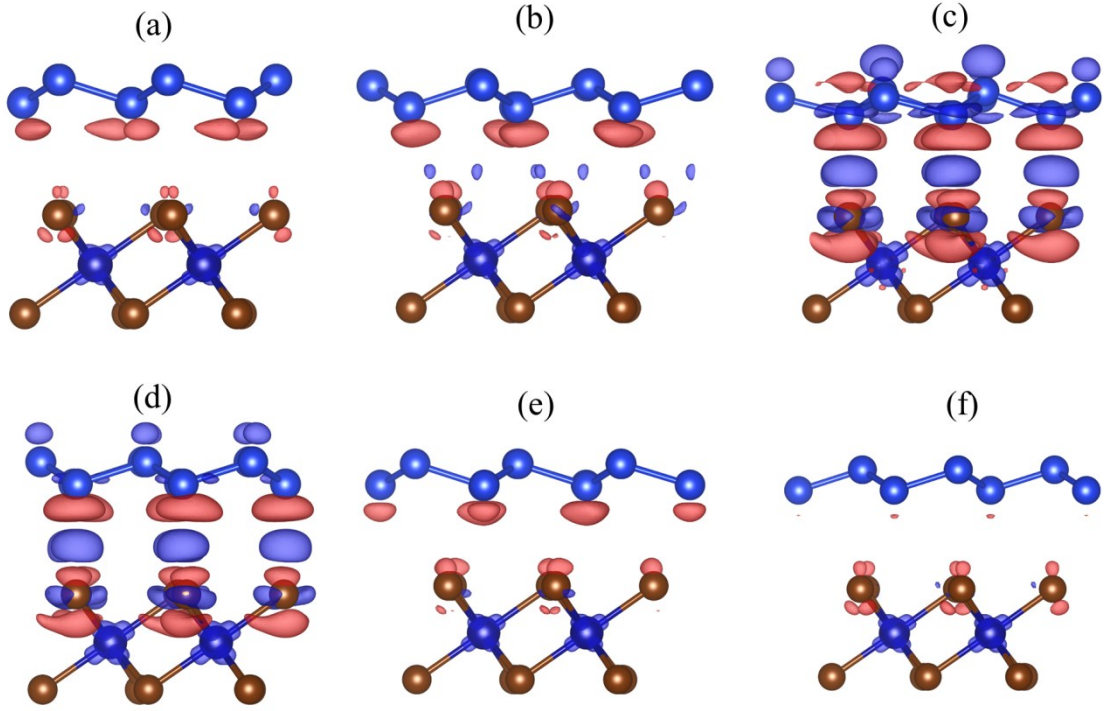

Fig. S2 Charge difference density of Si/CrBr<sub>3</sub> for difference configuration (a)(d) TX<sub>up/dn</sub>, (b)(e) TbX<sub>up/dn</sub>, (c)(f) TuX<sub>up/dn</sub>. The blue and red represent the charge accumulation and depletion, the isosurface is set as 0.0005 eV·Å<sup>3</sup>

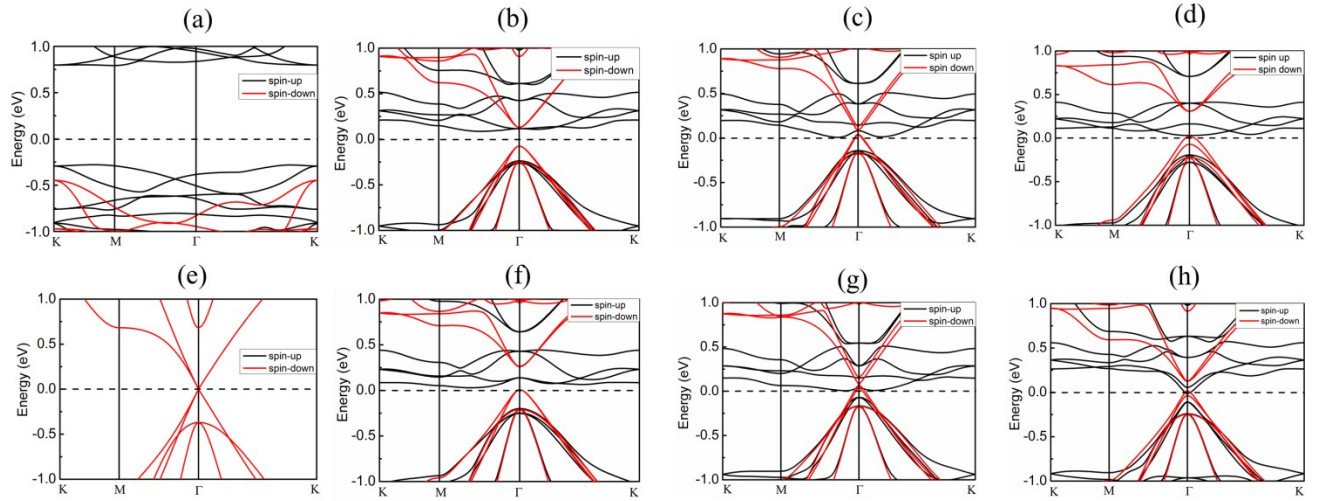

Fig. S3 The spin-polarized band structure of Ge/CrI<sub>3</sub> at different configurations. (b)(f) TX<sub>up/dn</sub>, (c)(g) TbX<sub>up/dn</sub>, (d)(h) TuX<sub>up/dn</sub>. (a)(e) the band of single-layer CrI<sub>3</sub> and germanene

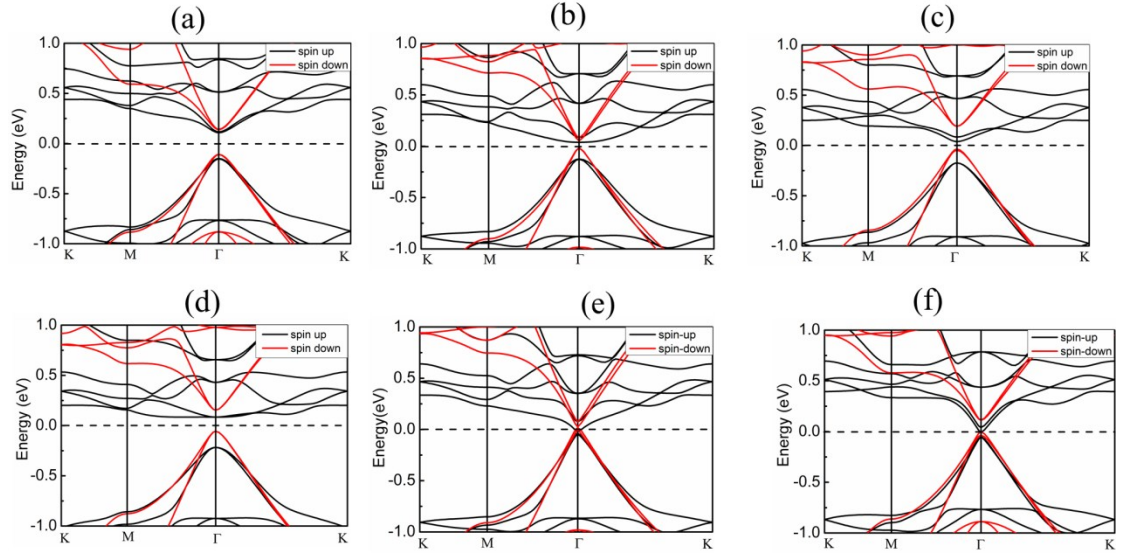

Fig. S4 The spin-polarized band structure of Si/CrI<sub>3</sub> at different configurations. (a)(d) TX\_up/dn, (b)(e) TbX\_up/dn, (c)(f) TuX\_up/dn

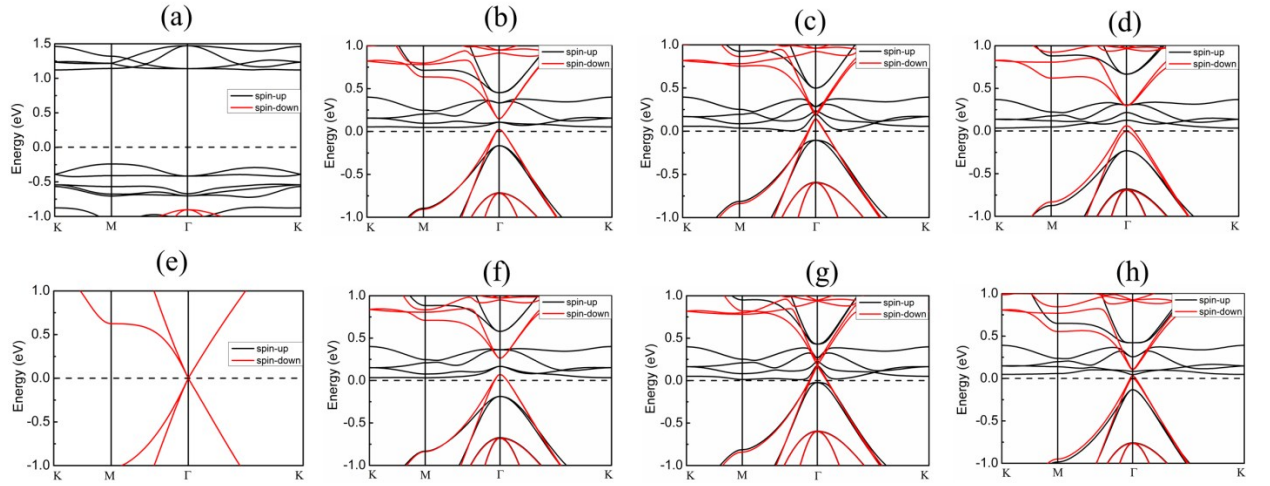

Fig. S5 The spin-polarized band structure of Si/CrBr<sub>3</sub> at different configurations. (b)(f) TX\_up/dn, (c)(g) TbX\_up/dn, (d)(h) TuX\_up/dn. (a)(e) the band of single-layer CrBr<sub>3</sub> and silicene.
